# Supplementary material for: Bacillus-based biocontrol beyond chemical control in central Africa: the challenge of turning myth into reality
Source: Front Plant Sci. 2024 Feb 6;15:1349357. doi: 10.3389/fpls.2024.1349357 (PMC10877027; doi:10.3389/fpls.2024.1349357)
Supplement: Supplementary file 1 [file Table_1.docx]

Supplementary Material

***Bacillus*-based biocontrol beyond chemical control in central Africa: the challenge of turning myth into reality.**

Gaspard Nihorimbere1,6*†, Virginie Korangi Alleluya2,4*†, François Nimbeshaho2,5*†, Venant Nihorimbere3, Anne Legrève1* and Marc Ongena2*

**Correspondence:**Gaspard Nihorimbere [gaspard.nihorimbere@uclouvain.be](mailto:gaspard.nihorimbere@uclouvain.be); [nihorimbereg@yahoo.fr](mailto:nihorimbereg@yahoo.fr);

Virginie Korangi Alleluya : [v.korangi@doct.uliege.be](mailto:v.korangi@doct.uliege.be), [virginiekorangi@gmail.com](mailto:virginiekorangi@gmail.com);

François Nimbeshaho : [fnimbeshaho@uliege.be](mailto:fnimbeshaho@uliege.be); [francois.nimbeshaho@gmail.com](mailto:francois.nimbeshaho@gmail.com);

Anne Legrève [anne.legreve@uclouvain.be](mailto:anne.legreve@uclouvain.be);

Marc Ongena [marc.ongena@uliege.be](mailto:marc.ongena@uliege.be)

# Table S1: Registered pesticides in the GLCCA countries. R, registered; NR, not registered; Names in red, EU banned pesticides.

| Class of pesticides | Active ingredients | Burundi | DRC | Rwanda |
| --- | --- | --- | --- | --- |
| Insecticides + Acaricides | Abamectin | R[[1]](#footnote-1) | R | NR[[2]](#footnote-2) |
| Acephate[[3]](#footnote-3) | R | NR | NR |
| Acetamiprid | R | R | R |
| Acrinathrin | NR | NR | R |
| Alpha-cypermethrin | R | NR | R |
| Aluminium phosphide | R | NR | R |
| Azocyclotin | NR | NR | R |
| Benfuracarb | R | NR | NR |
| Beta-cyfluthrin | R | NR | R |
| Bifenthrin | R | R | R |
| Bromopropylate | NR | NR | R |
| Buprofenzin | NR | NR | R |
| Carbofuran | NR | NR | R |
| Carbosulfan | NR | NR | R |
| Chlorfenapyr | NR | NR | R |
| Chlorpyriphos | R | NR | NR |
| Chlorpyriphos-ethyl | R | R | NR |
| Chlorpyriphos-methyl | R | NR | NR |
| Clofentezin | NR | NR | R |
| Copper oxychloride | NR | R | NR |
| Cyfluthrin | R | NR | NR |
| Cypermethrin | R | R | R |
| Cyphenothrin | NR | R | NR |
| Cyromazine | NR | NR | R |
| Deltamethrin | R | R | R |
| Diafenthiuron | NR | NR | R |
| Diazinon | R | NR | NR |
| Dichlorvos | R | NR | NR |
| Diflubenzuron | NR | NR | R |
| Dimethoate | R | R | NR |
| Esfenvalerate | R | R | NR |
| Fenamiphos | NR | NR | R |
| Fenaxaquin | NR | NR | R |
| Fenbutatin oxide | NR | NR | R |
| Fenitrothion | R | R | NR |
| Fenthion | R | NR | NR |
| Fenvalerate | R | NR | NR |
| Fipronil | R | R | R |
| Flufenoxuron | NR | NR | R |
| Flumethrin | NR | NR | R |
| Imidacloprid | R | R | R |
| Indoxacarb | NR | NR | R |
| Isoxathion | R | NR | NR |
| Lambda-cyhalothrin | R | R | R |
| Lufenuron | R | NR | NR |
| Magnesium Phosphide | R | NR | R |
| Malathion | R | NR | R |
| Methomyl | NR | NR | R |
| Methoxyfenozide | NR | NR | R |
| Nicosulfuron | NR | R | NR |
| Novaluron | NR | NR | R |
| Omethoate | R | NR | NR |
| Oxydemeton-methyl | R | NR | NR |
| Permethrin | NR | NR | R |
| Piperonyl Butoxide (PBO) | NR | NR | R |
| Pirimiphos | R | NR | R |
| Pirimiphos-Methyl | NR | NR | R |
| Profenofos | NR | NR | R |
| Prosuler Oxamatrine | R | NR | NR |
| Pymetrozine | R | NR | NR |
| Pyridaphenthion | NR | R | NR |
| Pyrimicarb | R | R | R |
| Snake repellent | NR | NR | R |
| Spiromesifen | NR | NR | R |
| Tau-fluvalinat | NR | NR | R |
| Teflubenzuron | NR | NR | R |
| Tetradifon | NR | NR | R |
| Tetramethrin | NR | R | NR |
| Thiacloprid | NR | NR | R |
| Thiamethoxam | NR | R | R |
| Tralomethrin | R | NR | NR |
| Triazophos | R | NR | NR |
| Zeta-cypermethrin | R | NR | NR |
| Fungicides | Albesilate | NR | NR | R |
| Azoxystrobin | R | NR | R |
| Benalaxyl | NR | NR | R |
| Benomyl | R | NR | R |
| Bitertanol | NR | NR | R |
| bromoxinyl-octanoate | NR | NR | R |
| Bupimate | NR | NR | R |
| Calcium Hypochlorite | NR | NR | R |
| Captan | NR | NR | R |
| Carbendazim | NR | NR | R |
| Carboxin | NR | NR | R |
| Chlorothalonil | R | NR | R |
| Copper | NR | NR | R |
| Copper ammonium acetate | NR | NR | R |
| Copper hydroxide | R | R | R |
| Copper oxychloride | R | R | R |
| Cuprous Oxide | NR | NR | R |
| Cymoxanil | NR | NR | R |
| Cyproconazole | NR | NR | R |
| Dichlofluanid | NR | NR | R |
| Didecyldimethylammonium chloride | NR | NR | R |
| Difenoconazole | NR | R | R |
| Dimethomorphe | NR | NR | R |
| Dithianon | NR | NR | R |
| Dodemorph acetate | NR | NR | R |
| Epoxiconazole | NR | NR | R |
| Fenarimol | NR | NR | R |
| Fenamidone | NR | NR | R |
| Fenhexamid | NR | NR | R |
| Flutriafol | NR | NR | R |
| Fluzilazol | NR | NR | R |
| Fosetyl - Aluminium | R | NR | R |
| Hexaconazole | NR | R | R |
| Imidachloriprid | NR | NR | R |
| Iprobenfos | R | NR | R |
| Iprodione | R | NR | R |
| Iprovalicarb | NR | NR | R |
| Isoxadifen-ethyl | NR | NR | R |
| Kresoxim-methyl | NR | NR | R |
| Mancozeb | R | R | R |
| Maneb | R | NR | NR |
| Mefenaxam | NR | NR | R |
| Metalaxyl | R | R | R |
| Metiram | NR | NR | R |
| Micronised Sulphur | NR | NR | R |
| Penconazole | NR | NR | R |
| Pencycuron | NR | NR | R |
| Prochloraz | R | NR | NR |
| Propamocarb hydrochloride | NR | NR | R |
| Propineb | NR | NR | R |
| Pyrimethanil | NR | NR | R |
| Spiroxamine | NR | NR | R |
| Sulphur | NR | R | R |
| Tebuconazole | R | NR | R |
| Thiabendazole | NR | NR | R |
| Thiophanate methyl | R | R | R |
| Thiram | R | R | R |
| Tolclofos Methyl | NR | NR | R |
| Triadimefon | NR | R | NR |
| Triadimenol | NR | R | NR |
| Tricyclazole | NR | NR | R |
| Trifloxystrobin | NR | NR | R |
| Triforine | NR | NR | R |
| Vinchlozoline | NR | NR | R |
| Herbicides | 2,4-D | R | NR | R |
| 2,4-DB | R | NR | NR |
| Ametryn | R | NR | NR |
| Atrazine | R | R | NR |
| Bispyribac sodium | NR | R | NR |
| Clethodim | NR | NR | R |
| Dalapon | R | NR | R |
| Dimethamethryn | R | NR | NR |
| Diuron | R | NR | R |
| Fluazifop butyl | NR | R | NR |
| Fluazifop-p-butyl | R | NR | NR |
| Fluroxypyr | NR | R | NR |
| Fluroxypyr ester-methylheptyl | NR | R | NR |
| Glyphosate | R | R | R |
| Hexazinone | R | NR | NR |
| Isoproturon | R | NR | NR |
| Linuron | NR | NR | R |
| Methribuzin | NR | NR | R |
| Metolachlor | R | NR | R |
| Metribuzin | R | NR | NR |
| MSMA | R | NR | NR |
| Nicosulfuron | NR | R | NR |
| Oxadiazon | NR | R | NR |
| Oxyfluorfen | NR | NR | R |
| Penoxsulam | NR | R | NR |
| Promethrin | R | NR | NR |
| Propanil | NR | NR | R |
| Tembrotrione | NR | NR | R |
| Terbutryn | NR | NR | R |
| Thiobencarb | NR | NR | R |
| Triclopyr | NR | R | NR |
| Rodenticides | Brodifacoum | R | NR | R |
| Bromadiolone | R | R | R |
| Chlorophacinone | R | NR | NR |
| Coumatetralyl | R | NR | R |
| Difenacoum | R | NR | R |
| Diphacinone | R | NR | R |
| Flocoumafen | R | NR | NR |
| Nematicides | Dazomet | R | NR | R |
| Fenamiphos | NR | NR | R |
| Oxamyl | NR | R | NR |
| Terbufos | R | NR | NR |
| Molluscicides | Mercaptodimethur | NR | NR | R |
| Metaldehyde | R | NR | R |
| Growth regulators | Serricornine | R | NR | NR |
| Etherphon | NR | R | NR |
| Daminozide | NR | NR | R |
| Biopesticides | Azadirachtin | NR | NR | R |
| *Bacillus thuringiensis* | R | R | R |
| *Beauveria bassiana* | NR | NR | R |
| Pyrethrins | NR | NR | R |
| Spinosad | NR | NR | R |
| *Trichoderma harzianum* | NR | NR | R |
| Emamectine benzoate | NR | R | NR |

1. [↑](#footnote-ref-1)
2. [↑](#footnote-ref-2)
3. [↑](#footnote-ref-3)
